# Supplementary material for: Pilot-RCT Finds No Evidence for Modulation of Neuronal Networks of Auditory Hallucinations by Transcranial Direct Current Stimulation
Source: Brain Sci. 2022 Oct 12;12(10):1382. doi: 10.3390/brainsci12101382 (PMC9599056; doi:10.3390/brainsci12101382)
Supplement: Supplementary file 1 [file brainsci-12-01382-s001.zip › brainsci-1945179-supplementary.pdf]

## Supplementary material

### Methods

Table S1

*Overview of the MRI sequences (in the order they were run) at baseline, post-treatment, and follow-up. Location I and location II are placeholders for the left DLPFC and TPC that were scanned in counterbalanced order.*

| Sequence                   | Time<br>(min:s) |
|----------------------------|-----------------|
| Structural T1 scan         | 07:07           |
| MRS PRESS, location I      | 03:48           |
| MRS MEGAPRESS, location I  | 10:12           |
| MRS PRESS , location II    | 03:48           |
| MRS MEGAPRESS, location II | 10:12           |
| Resting state fMRI         | 05:30           |
| Dichotic listening/ fMRI   | 08:28           |
| Arterial Spin Labelling*   | 04:14           |

*Structural T1 scan, MRS, resting state fMRI: n=15; real/sham=9/6; Dichotic Listening/fMRI: n=11; real/sham= 6/5*

*\*Not reported here.*

### Results

#### Structural analysis

Exploratory t-tests were carried out for all 74 regions per hemisphere provided by the analysis comparing baseline and post-treatment for the whole group (Figure S1), as well as the real (FigureS 2) and sham group (Figure S3) separately, for three anatomical measures: surface area, gray matter volume, and average cortical thickness. The presented *p*-values in Figure S1, S2, and S3 are not corrected for multiple testing, and all are above 0.001 (the most significant being  $10^{-2.8} = 0.0016$ ). So, none would reach significance if, for instance, Bonferroni correction for 444 variables was done.

Figure S1

Overview of t-tests comparing the whole group between baseline and treatment surface area, gray matter volume, and average cortical thickness for all 74 brain regions per hemisphere.

|                                    | prepost lh.SurfArea | prepost lh.GrayVol | prepost lh.ThickAvg | prepost rh.SurfArea | prepost rh.GrayVol | prepost rh.ThickAvg |                            |
|------------------------------------|---------------------|--------------------|---------------------|---------------------|--------------------|---------------------|----------------------------|
| All Subjects (L/R), -log10(pvalue) |                     |                    |                     |                     |                    |                     |                            |
| G_and_S_frontomargin               | 0.2                 | 0.1                | 0.0                 | 0.4                 | 0.2                | 0.2                 | G_and_S_frontomargin       |
| G_and_S_occipital_inf              | 0.9                 | 1.2                | 0.5                 | 0.4                 | 0.3                | 0.2                 | G_and_S_occipital_inf      |
| G_and_S_paracentral                | 0.7                 | 0.8                | 0.2                 | 0.1                 | 0.7                | 0.6                 | G_and_S_paracentral        |
| G_and_S_subcentral                 | 0.1                 | 1.1                | 0.2                 | 1.2                 | 1.1                | 0.2                 | G_and_S_subcentral         |
| G_and_S_transv_frontopol           | 0.2                 | 0.0                | 0.4                 | 1.0                 | 0.2                | 0.8                 | G_and_S_transv_frontopol   |
| G_and_S_cingul-Ant                 | 0.1                 | 0.1                | 0.1                 | 0.3                 | 0.3                | 0.0                 | G_and_S_cingul-Ant         |
| G_and_S_cingul-Mid-Ant             | 1.1                 | 1.5                | 0.5                 | 1.1                 | 1.3                | 0.4                 | G_and_S_cingul-Mid-Ant     |
| G_and_S_cingul-Mid-Post            | 0.6                 | 0.4                | 0.1                 | 0.2                 | 0.3                | 0.1                 | G_and_S_cingul-Mid-Post    |
| G_cingul-Post-dorsal               | 0.0                 | 0.0                | 0.1                 | 0.6                 | 0.2                | 0.6                 | G_cingul-Post-dorsal       |
| G_cingul-Post-ventral              | 0.6                 | 0.5                | 0.1                 | 0.3                 | 0.3                | 0.2                 | G_cingul-Post-ventral      |
| G_cuneus                           | 0.7                 | 0.0                | 0.5                 | 0.0                 | 0.1                | 0.2                 | G_cuneus                   |
| G_front_inf-Opercular              | 0.6                 | 0.5                | 0.0                 | 0.2                 | 0.2                | 0.8                 | G_front_inf-Opercular      |
| G_front_inf-Orbital                | 0.2                 | 0.3                | 0.2                 | 0.7                 | 0.3                | 0.0                 | G_front_inf-Orbital        |
| G_front_inf-Triangular             | 0.5                 | 0.7                | 0.4                 | 0.4                 | 0.5                | 0.2                 | G_front_inf-Triangular     |
| G_front_middle                     | 0.2                 | 0.7                | 0.2                 | 0.5                 | 0.3                | 0.3                 | G_front_middle             |
| G_front_sup                        | 1.2                 | 0.6                | 0.0                 | 0.9                 | 0.5                | 0.5                 | G_front_sup                |
| G_ins_lg_and_S_cent_ins            | 0.3                 | 0.9                | 0.4                 | 0.1                 | 0.3                | 0.3                 | G_ins_lg_and_S_cent_ins    |
| G_insular_short                    | 1.3                 | 0.1                | 0.4                 | 0.1                 | 0.0                | 0.2                 | G_insular_short            |
| G_occipital_middle                 | 0.2                 | 0.1                | 0.3                 | 0.6                 | 0.6                | 0.0                 | G_occipital_middle         |
| G_occipital_sup                    | 0.1                 | 0.2                | 0.1                 | 0.3                 | 0.1                | 0.3                 | G_occipital_sup            |
| G_oc-temp_lat-fusiform             | 0.9                 | 0.4                | 0.7                 | 1.3                 | 0.1                | 1.7                 | G_oc-temp_lat-fusiform     |
| G_oc-temp_med-Lingual              | 0.6                 | 0.0                | 0.3                 | 0.7                 | 0.3                | 0.8                 | G_oc-temp_med-Lingual      |
| G_oc-temp_med-Parahipp             | 0.4                 | 0.0                | 0.3                 | 0.1                 | 0.2                | 0.0                 | G_oc-temp_med-Parahipp     |
| G_orbital                          | 0.6                 | 0.3                | 0.0                 | 0.1                 | 0.1                | 0.1                 | G_orbital                  |
| G_pariet_inf-Angular               | 0.7                 | 0.3                | 0.2                 | 0.6                 | 0.1                | 0.4                 | G_pariet_inf-Angular       |
| G_pariet_inf-Supramarginal         | 1.0                 | 0.2                | 0.2                 | 0.0                 | 0.3                | 0.5                 | G_pariet_inf-Supramarginal |
| G_parietal_sup                     | 0.1                 | 0.2                | 0.6                 | 0.0                 | 0.4                | 0.6                 | G_parietal_sup             |
| G_postcentral                      | 0.3                 | 0.6                | 0.2                 | 0.5                 | 0.2                | 0.1                 | G_postcentral              |
| G_precentral                       | 0.0                 | 0.0                | 0.1                 | 0.2                 | 0.7                | 0.6                 | G_precentral               |
| G_precuneus                        | 0.7                 | 0.5                | 0.2                 | 0.4                 | 0.0                | 0.2                 | G_precuneus                |
| G_rectus                           | 0.0                 | 0.1                | 0.1                 | 0.8                 | 1.1                | 0.2                 | G_rectus                   |
| G_subcallosal                      | 0.1                 | 0.1                | 0.7                 | 0.2                 | 0.4                | 0.1                 | G_subcallosal              |
| G_temp_sup-G_T_transv              | 0.1                 | 0.0                | 0.1                 | 0.1                 | 0.1                | 0.2                 | G_temp_sup-G_T_transv      |
| G_temp_sup-Lateral                 | 0.8                 | 1.3                | 1.0                 | 0.1                 | 0.5                | 0.2                 | G_temp_sup-Lateral         |
| G_temp_sup-Plan_polar              | 0.2                 | 0.2                | 0.6                 | 0.4                 | 0.6                | 0.3                 | G_temp_sup-Plan_polar      |
| G_temp_sup-Plan_tempo              | 0.0                 | 0.0                | 0.1                 | 1.0                 | 1.2                | 0.6                 | G_temp_sup-Plan_tempo      |
| G_temporal_inf                     | 0.3                 | 0.1                | 0.7                 | 0.3                 | 1.1                | 0.3                 | G_temporal_inf             |
| G_temporal_middle                  | 1.0                 | 0.5                | 0.6                 | 0.0                 | 0.3                | 0.2                 | G_temporal_middle          |
| Lat_Fis-ant-Horizont               | 1.2                 | 1.2                | 0.8                 | 0.4                 | 0.0                | 0.4                 | Lat_Fis-ant-Horizont       |
| Lat_Fis-ant-Vertical               | 0.2                 | 0.3                | 0.5                 | 0.1                 | 0.1                | 0.1                 | Lat_Fis-ant-Vertical       |
| Lat_Fis-post                       | 0.2                 | 0.1                | 0.1                 | 1.2                 | 0.6                | 0.0                 | Lat_Fis-post               |
| Pole_occipital                     | 0.3                 | 0.7                | 0.2                 | 0.2                 | 0.1                | 0.2                 | Pole_occipital             |
| Pole_temporal                      | 0.5                 | 0.1                | 0.3                 | 0.2                 | 0.3                | 0.6                 | Pole_temporal              |
| S_calcarine                        | 0.2                 | 0.1                | 0.4                 | 0.1                 | 0.2                | 0.5                 | S_calcarine                |
| S_central                          | 0.8                 | 0.3                | 0.2                 | 0.9                 | 1.1                | 0.5                 | S_central                  |
| S_cingul-Marginalis                | 0.2                 | 0.1                | 0.5                 | 0.3                 | 0.4                | 0.2                 | S_cingul-Marginalis        |
| S_circular_insula_ant              | 0.0                 | 0.2                | 1.4                 | 0.1                 | 0.1                | 0.2                 | S_circular_insula_ant      |
| S_circular_insula_inf              | 0.2                 | 0.2                | 0.1                 | 0.3                 | 0.2                | 0.5                 | S_circular_insula_inf      |
| S_circular_insula_sup              | 0.5                 | 0.5                | 0.0                 | 0.3                 | 0.1                | 2.1                 | S_circular_insula_sup      |
| S_collat_transv_ant                | 0.0                 | 0.0                | 0.0                 | 0.9                 | 0.7                | 0.3                 | S_collat_transv_ant        |
| S_collat_transv_post               | 0.0                 | 0.0                | 0.3                 | 0.1                 | 0.2                | 0.2                 | S_collat_transv_post       |
| S_front_inf                        | 0.1                 | 0.1                | 0.6                 | 0.2                 | 0.3                | 0.2                 | S_front_inf                |
| S_front_middle                     | 1.4                 | 1.9                | 1.5                 | 0.2                 | 0.2                | 0.3                 | S_front_middle             |
| S_front_sup                        | 0.1                 | 0.1                | 0.6                 | 0.4                 | 0.4                | 0.2                 | S_front_sup                |
| S_interm_prim-Jensen               | 0.8                 | 0.6                | 0.0                 | 0.2                 | 0.4                | 0.1                 | S_interm_prim-Jensen       |
| _intrapariet_and_P_trans           | 0.6                 | 0.6                | 0.2                 | 0.1                 | 0.1                | 0.0                 | _intrapariet_and_P_trans   |
| S_oc_middle_and_Lunate             | 0.1                 | 0.3                | 0.1                 | 0.2                 | 0.1                | 0.2                 | S_oc_middle_and_Lunate     |
| S_oc_sup_and_transversal           | 0.8                 | 1.0                | 0.1                 | 0.5                 | 0.4                | 0.3                 | S_oc_sup_and_transversal   |
| S_occipital_ant                    | 0.2                 | 0.5                | 0.5                 | -0.0                | 0.2                | 0.2                 | S_occipital_ant            |
| S_oc-temp_lat                      | 0.4                 | 0.5                | 0.1                 | 1.2                 | 1.4                | 0.0                 | S_oc-temp_lat              |
| S_oc-temp_med_and_Lingual          | 0.6                 | 0.4                | 0.2                 | 0.2                 | 0.3                | 0.2                 | S_oc-temp_med_and_Lingual  |
| S_orbital_lateral                  | 0.5                 | 0.1                | 0.3                 | 0.1                 | 0.0                | 0.1                 | S_orbital_lateral          |
| S_orbital_med-olfact               | 0.6                 | 0.1                | 0.3                 | 0.1                 | 0.1                | 0.3                 | S_orbital_med-olfact       |
| S_orbital-H_Shaped                 | 0.7                 | 0.7                | 0.3                 | 0.3                 | 0.2                | 0.1                 | S_orbital-H_Shaped         |
| S_parieto_occipital                | 0.0                 | 0.1                | 0.1                 | 0.2                 | 0.2                | 0.3                 | S_parieto_occipital        |
| S_pericallosal                     | 0.0                 | 0.1                | 0.2                 | 0.1                 | 0.5                | 0.5                 | S_pericallosal             |
| S_postcentral                      | 0.3                 | 0.5                | 0.3                 | 0.8                 | 0.8                | 0.3                 | S_postcentral              |
| S_precentral-inf-part              | 0.7                 | 1.1                | 0.2                 | 0.4                 | 0.4                | 0.1                 | S_precentral-inf-part      |
| S_precentral-sup-part              | 0.7                 | 0.2                | 1.0                 | 0.2                 | 0.1                | 0.4                 | S_precentral-sup-part      |
| S_suborbital                       | 0.5                 | 0.3                | 0.5                 | 0.1                 | 0.1                | 0.2                 | S_suborbital               |
| S_subparietal                      | 0.6                 | 0.7                | 0.0                 | 0.0                 | 0.0                | 0.0                 | S_subparietal              |
| S_temporal_inf                     | 0.5                 | 0.0                | 0.9                 | 0.3                 | 0.1                | 0.9                 | S_temporal_inf             |
| S_temporal_sup                     | 0.1                 | 0.0                | 0.2                 | 0.1                 | 0.1                | 0.0                 | S_temporal_sup             |
| S_temporal_transverse              | 0.4                 | 0.5                | 0.7                 | 0.5                 | 0.6                | 0.5                 | S_temporal_transverse      |

**Note.** SurfArea = surface area; GrayVol = gray matter volume; ThickAvg = average cortical thickness; lh = left hemisphere; rh = right hemisphere.  $p$ -values are expressed as the negative exponents of ten. For example, 0.2 translates into  $p = 10^{-0.2} = 0.631$ . This corresponds with approximately 1.3 for  $p=0.05$ , 2.0 for  $p=0.01$ , and 3.0 for  $p=0.001$ .

Figure S2

*T*-tests for all the 74 regions per hemisphere in the structural analysis in the real tDCS group (Stim) between baseline and post-treatment are given for surface area, gray matter volume, and average cortical thickness.

|                                | prepost.lh.SurfArea | prepost.lh.GrayVol | prepost.lh.ThickAvg | Stim (L/R), -log10(pvalue) | prepost.rh.SurfArea | prepost.rh.GrayVol | prepost.rh.ThickAvg |                                |
|--------------------------------|---------------------|--------------------|---------------------|----------------------------|---------------------|--------------------|---------------------|--------------------------------|
| G_and_S_frontomargin           | 0.5                 | 0.0                | 0.0                 | 1.2                        | 0.6                 | 0.2                |                     | G_and_S_frontomargin           |
| G_and_S_occipital_inf          | 1.2                 | 1.1                | 0.2                 | 0.5                        | 0.2                 | 0.8                |                     | G_and_S_occipital_inf          |
| G_and_S_paracentral            | 0.7                 | 0.6                | 0.2                 | 0.2                        | 0.3                 | 0.4                |                     | G_and_S_paracentral            |
| G_and_S_subcentral             | 0.0                 | 0.4                | 0.1                 | 2.6                        | 2.3                 | 0.3                |                     | G_and_S_subcentral             |
| I_and_S_transv_frontopol       | 0.2                 | 0.1                | 1.3                 | 1.3                        | 0.8                 | 0.7                |                     | G_and_S_transv_frontopol       |
| G_and_S_cingul-Ant             | 0.6                 | 0.2                | 0.0                 | 0.7                        | 0.8                 | 0.1                |                     | G_and_S_cingul-Ant             |
| G_and_S_cingul-Mid-Ant         | 0.3                 | 0.8                | 0.3                 | 0.6                        | 0.9                 | 0.1                |                     | G_and_S_cingul-Mid-Ant         |
| G_and_S_cingul-Mid-Post        | 0.6                 | 0.5                | 0.3                 | 0.2                        | 0.3                 | 0.2                |                     | G_and_S_cingul-Mid-Post        |
| G_cingul-Post-dorsal           | 0.4                 | 0.1                | 0.3                 | 0.2                        | 0.3                 | 0.3                |                     | G_cingul-Post-dorsal           |
| G_cingul-Post-ventral          | 0.3                 | 0.3                | 0.2                 | 0.2                        | 0.2                 | 0.1                |                     | G_cingul-Post-ventral          |
| G_cuneus                       | 0.1                 | 0.2                | 0.1                 | 0.4                        | 0.1                 | 0.3                |                     | G_cuneus                       |
| G_front_inf-Opercular          | 0.2                 | 0.5                | 0.1                 | 0.0                        | 0.7                 | 0.6                |                     | G_front_inf-Opercular          |
| G_front_inf-Orbital            | 0.9                 | 0.7                | 0.5                 | 0.2                        | 0.0                 | 0.1                |                     | G_front_inf-Orbital            |
| G_front_inf-Triangular         | 2.0                 | 0.9                | 0.0                 | 0.0                        | 0.1                 | 0.0                |                     | G_front_inf-Triangular         |
| G_front_middle                 | 0.1                 | 0.8                | 0.2                 | 0.5                        | 0.1                 | 1.6                |                     | G_front_middle                 |
| G_front_sup                    | 0.6                 | 0.0                | 0.1                 | 0.9                        | 0.8                 | 0.3                |                     | G_front_sup                    |
| I_ins_lg_and_S_cent_ins        | 0.7                 | 0.9                | 0.0                 | 0.4                        | 0.4                 | 0.0                |                     | G_ins_lg_and_S_cent_ins        |
| G_insular_short                | 0.6                 | 0.0                | 0.5                 | 0.2                        | 0.3                 | 0.4                |                     | G_insular_short                |
| G_occipital_middle             | 0.1                 | 0.1                | 0.5                 | 0.5                        | 0.4                 | 0.1                |                     | G_occipital_middle             |
| G_occipital_sup                | 0.2                 | 0.6                | 0.4                 | 0.5                        | 0.7                 | 0.1                |                     | G_occipital_sup                |
| G_oc-temp_lat-fusiform         | 0.1                 | 0.0                | 0.1                 | 1.1                        | 0.1                 | 2.3                |                     | G_oc-temp_lat-fusiform         |
| G_oc-temp_med-Lingual          | 0.1                 | 0.2                | 0.4                 | 0.7                        | 0.2                 | 0.7                |                     | G_oc-temp_med-Lingual          |
| G_oc-temp_med-Parahipp         | 2.0                 | 0.2                | 0.6                 | 0.3                        | 0.7                 | 0.0                |                     | G_oc-temp_med-Parahipp         |
| G_orbital                      | 0.1                 | 0.5                | 0.4                 | 0.1                        | 0.0                 | 0.2                |                     | G_orbital                      |
| G_pariet_inf-Angular           | 0.9                 | 0.2                | 0.2                 | 0.1                        | 0.1                 | 0.5                |                     | G_pariet_inf-Angular           |
| G_pariet_inf-Supramarginal     | 0.4                 | 0.3                | 0.2                 | 0.3                        | 0.7                 | 0.6                |                     | G_pariet_inf-Supramarginal     |
| G_parietal_sup                 | 0.3                 | 0.1                | 0.8                 | 0.2                        | 0.7                 | 0.8                |                     | G_parietal_sup                 |
| G_postcentral                  | 0.2                 | 0.1                | 0.2                 | 0.8                        | 0.0                 | 0.4                |                     | G_postcentral                  |
| G_precentral                   | 0.1                 | 0.2                | 0.1                 | 0.2                        | 1.8                 | 0.6                |                     | G_precentral                   |
| G_precuneus                    | 0.5                 | 0.6                | 0.0                 | 0.2                        | 0.1                 | 0.2                |                     | G_precuneus                    |
| G_rectus                       | 1.7                 | 0.4                | 0.0                 | 0.2                        | 0.7                 | 0.8                |                     | G_rectus                       |
| G_subcallosal                  | 0.3                 | 0.8                | 0.6                 | 0.1                        | 0.0                 | 0.2                |                     | G_subcallosal                  |
| G_temp_sup-G_T_transverse      | 0.3                 | 0.5                | 0.0                 | 0.0                        | 0.1                 | 0.1                |                     | G_temp_sup-G_T_transverse      |
| G_temp_sup-Lateral             | 0.3                 | 0.5                | 0.7                 | 0.1                        | 0.5                 | 0.2                |                     | G_temp_sup-Lateral             |
| G_temp_sup-Plan_polar          | 0.1                 | 0.1                | 0.1                 | 0.7                        | 1.2                 | 0.4                |                     | G_temp_sup-Plan_polar          |
| G_temp_sup-Plan_temporal       | 0.2                 | 0.2                | 0.3                 | 0.2                        | 0.3                 | 0.6                |                     | G_temp_sup-Plan_temporal       |
| G_temporal_inf                 | 0.0                 | 0.0                | 0.1                 | 0.0                        | 0.3                 | 0.1                |                     | G_temporal_inf                 |
| G_temporal_middle              | 0.3                 | 0.5                | 0.3                 | 0.3                        | 0.1                 | 0.2                |                     | G_temporal_middle              |
| Lat_Fis-ant-Horizantal         | 0.6                 | 0.7                | 0.9                 | 0.8                        | 1.0                 | 0.2                |                     | Lat_Fis-ant-Horizantal         |
| Lat_Fis-ant-Vertical           | 0.2                 | 0.7                | 0.7                 | 0.1                        | 0.4                 | 0.2                |                     | Lat_Fis-ant-Vertical           |
| Lat_Fis-post                   | 0.7                 | 0.0                | 0.5                 | 1.0                        | 0.6                 | 0.1                |                     | Lat_Fis-post                   |
| Pole_occipital                 | 0.7                 | 0.8                | 0.2                 | 0.8                        | 0.2                 | 0.0                |                     | Pole_occipital                 |
| Pole_temporal                  | 0.2                 | 0.4                | 0.1                 | 0.1                        | 0.5                 | 0.5                |                     | Pole_temporal                  |
| S_calcarine                    | 0.1                 | 0.1                | 0.1                 | 0.7                        | 0.3                 | 0.3                |                     | S_calcarine                    |
| S_central                      | 0.1                 | 0.1                | 0.4                 | 0.6                        | 0.5                 | 0.2                |                     | S_central                      |
| S_cingul-Marginalis            | 0.2                 | 0.1                | 0.5                 | 0.3                        | 0.4                 | 0.1                |                     | S_cingul-Marginalis            |
| S_circular_insula_ant          | 0.0                 | 0.3                | 1.6                 | 0.2                        | 0.4                 | 0.5                |                     | S_circular_insula_ant          |
| S_circular_insula_inf          | 0.0                 | 0.2                | 0.2                 | 0.0                        | 0.1                 | 0.3                |                     | S_circular_insula_inf          |
| S_circular_insula_sup          | 0.3                 | 0.3                | 0.2                 | 0.0                        | 0.2                 | 1.1                |                     | S_circular_insula_sup          |
| S_collat_transv_ant            | 0.2                 | 0.1                | 0.1                 | 0.4                        | 0.0                 | 0.5                |                     | S_collat_transv_ant            |
| S_collat_transv_post           | 0.0                 | 0.1                | 0.0                 | 0.3                        | 0.2                 | 0.4                |                     | S_collat_transv_post           |
| S_front_inf                    | 0.0                 | 0.1                | 0.0                 | 1.2                        | 0.6                 | 0.4                |                     | S_front_inf                    |
| S_front_middle                 | 0.6                 | 1.0                | 1.3                 | 0.1                        | 0.1                 | 1.0                |                     | S_front_middle                 |
| S_front_sup                    | 0.1                 | 0.0                | 1.1                 | 0.4                        | 0.5                 | 0.3                |                     | S_front_sup                    |
| S_interm_prim-Jensen           | 0.1                 | 0.1                | 0.2                 | 0.3                        | 0.1                 | 0.3                |                     | S_interm_prim-Jensen           |
| S_intrapariet_and_P_transverse | 0.3                 | 0.4                | 0.6                 | 0.0                        | 0.4                 | 0.7                |                     | S_intrapariet_and_P_transverse |
| S_oc_middle_and_Lunatus        | 0.1                 | 0.5                | 0.3                 | 0.2                        | 0.4                 | 0.5                |                     | S_oc_middle_and_Lunatus        |
| S_oc_sup_and_transversal       | 0.4                 | 0.7                | 0.5                 | 0.8                        | 1.2                 | 0.3                |                     | S_oc_sup_and_transversal       |
| S_occipital_ant                | 0.0                 | 0.2                | 0.0                 | 0.0                        | 0.3                 | 0.6                |                     | S_occipital_ant                |
| S_oc-temp_lat                  | 0.4                 | 0.6                | 0.7                 | 0.4                        | 0.5                 | 0.4                |                     | S_oc-temp_lat                  |
| S_oc-temp_med_and_Lingual      | 0.4                 | 0.4                | 0.1                 | 0.8                        | 1.4                 | 0.4                |                     | S_oc-temp_med_and_Lingual      |
| S_orbital_lateral              | 0.1                 | 0.0                | 0.0                 | 0.0                        | 0.1                 | 1.0                |                     | S_orbital_lateral              |
| S_orbital_med-olfact           | 0.1                 | 0.2                | 0.3                 | 0.1                        | 0.0                 | 0.1                |                     | S_orbital_med-olfact           |
| S_orbital-H_Shaped             | 0.5                 | 0.2                | 0.0                 | 0.8                        | 1.1                 | 0.1                |                     | S_orbital-H_Shaped             |
| S_parieto_occipital            | 0.0                 | 0.0                | 0.2                 | 0.2                        | 0.1                 | 0.0                |                     | S_parieto_occipital            |
| S_pericallosal                 | 0.2                 | 0.3                | 0.4                 | 0.4                        | 0.7                 | 0.3                |                     | S_pericallosal                 |
| S_postcentral                  | 0.1                 | 0.4                | 1.0                 | 0.1                        | 0.0                 | 0.0                |                     | S_postcentral                  |
| S_precentral-inf-part          | 0.1                 | 0.8                | 1.0                 | 0.7                        | 0.8                 | 0.1                |                     | S_precentral-inf-part          |
| S_precentral-sup-part          | 0.3                 | 0.0                | 1.0                 | 0.3                        | 0.2                 | 1.8                |                     | S_precentral-sup-part          |
| S_suborbital                   | 0.8                 | 0.6                | 0.3                 | 0.1                        | 0.2                 | 1.0                |                     | S_suborbital                   |
| S_subparietal                  | 0.1                 | 0.3                | 0.2                 | 0.6                        | 0.7                 | 0.0                |                     | S_subparietal                  |
| S_temporal_inf                 | 0.4                 | 0.0                | 0.5                 | 0.2                        | 0.6                 | 1.2                |                     | S_temporal_inf                 |
| S_temporal_sup                 | 0.1                 | 0.2                | 0.2                 | 0.1                        | 0.1                 | 0.0                |                     | S_temporal_sup                 |
| S_temporal_transverse          | 0.3                 | 0.2                | 0.1                 | 0.1                        | 0.1                 | 0.2                |                     | S_temporal_transverse          |

**Note.** SurfArea = surface area; GrayVol = gray matter volume; ThickAvg = average cortical thickness; lh = left hemisphere; rh = right hemisphere. *p*-values are expressed as the negative exponents of ten.

Figure S3

*T*-tests for all the 74 regions per hemisphere in the structural analysis in the sham tDCS group (Sham) between baseline and post-treatment are given for surface area, gray matter volume, and average cortical thickness.

|                           | prepost.lh.SurfArea | prepost.lh.GrayVol | prepost.lh.ThickAvg | Sham (L/R), -log10(pvalue) | prepost.rh.SurfArea | prepost.rh.GrayVol | prepost.rh.ThickAvg |
|---------------------------|---------------------|--------------------|---------------------|----------------------------|---------------------|--------------------|---------------------|
| G_and_S_frontomargin      | 1.1                 | 0.2                | 0.0                 |                            | 0.1                 | 0.2                | 0.0                 |
| G_and_S_occipital_inf     | 0.0                 | 0.3                | 0.3                 |                            | 0.0                 | 0.2                | 0.1                 |
| G_and_S_paracentral       | 0.2                 | 0.4                | 0.1                 |                            | 0.1                 | 0.7                | 0.4                 |
| G_and_S_subcentral        | 0.2                 | 0.8                | 0.2                 |                            | 0.0                 | 0.0                | 0.2                 |
| G_and_S_transv_frontop    | 0.1                 | 0.2                | 0.5                 |                            | 0.2                 | 0.3                | 0.3                 |
| G_and_S_cingul-Ant        | 0.4                 | 0.4                | 0.1                 |                            | 0.4                 | 0.4                | 0.0                 |
| G_and_S_cingul-Mid-Ant    | 1.2                 | 0.9                | 0.3                 |                            | 0.7                 | 0.7                | 0.8                 |
| G_and_S_cingul-Mid-Post   | 0.1                 | 0.0                | 0.1                 |                            | 0.1                 | 0.1                | 0.1                 |
| G_cingul-Post-dorsal      | 0.7                 | 0.1                | 0.8                 |                            | 0.5                 | 0.1                | 0.5                 |
| G_cingul-Post-ventral     | 0.4                 | 0.5                | 0.0                 |                            | 0.1                 | 0.2                | 0.4                 |
| G_cuneus                  | 0.9                 | 0.1                | 0.5                 |                            | 1.1                 | 0.0                | 0.5                 |
| G_front_inf-Opercular     | 0.4                 | 0.1                | 0.3                 |                            | 0.4                 | 0.2                | 0.3                 |
| G_front_inf-Orbital       | 1.5                 | 0.9                | 0.3                 |                            | 1.0                 | 0.6                | 0.1                 |
| G_front_inf-Triangul      | 0.0                 | 0.2                | 0.9                 |                            | 1.0                 | 1.0                | 0.2                 |
| G_front_middle            | 0.1                 | 0.3                | 0.0                 |                            | 0.1                 | 0.7                | 0.9                 |
| G_front_sup               | 0.8                 | 1.2                | 0.4                 |                            | 0.0                 | 0.1                | 0.3                 |
| G_ins_lg_and_S_cent_inf   | 0.6                 | 0.2                | 0.5                 |                            | 0.3                 | 0.0                | 0.5                 |
| G_insular_short           | 1.8                 | 0.2                | 0.0                 |                            | 0.0                 | 0.3                | 0.4                 |
| G_occipital_middle        | 0.6                 | 0.2                | 0.6                 |                            | 0.3                 | 0.3                | 0.0                 |
| G_occipital_sup           | 0.5                 | 0.3                | 0.3                 |                            | 0.6                 | 0.4                | 0.3                 |
| G_oc-temp_lat-fusiform    | 1.1                 | 0.6                | 0.8                 |                            | 0.5                 | 0.0                | 0.4                 |
| G_oc-temp_med-Lingual     | 0.8                 | 0.5                | 1.8                 |                            | 0.1                 | 0.3                | 0.2                 |
| G_oc-temp_med-Parahip     | 0.3                 | 0.2                | 0.0                 |                            | 1.1                 | 1.0                | 0.0                 |
| G_orbital                 | 0.7                 | 0.1                | 0.8                 |                            | 0.0                 | 0.1                | 0.1                 |
| G_pariet_inf-Angular      | 0.0                 | 0.2                | 0.4                 |                            | 1.1                 | 0.4                | 0.1                 |
| G_pariet_inf-Supramar     | 0.7                 | 0.0                | 0.5                 |                            | 0.2                 | 0.4                | 0.1                 |
| G_parietal_sup            | 0.3                 | 0.1                | 0.1                 |                            | 0.2                 | 0.3                | 0.1                 |
| G_postcentral             | 0.2                 | 0.9                | 0.9                 |                            | 0.1                 | 0.2                | 0.1                 |
| G_precentral              | 0.1                 | 0.3                | 0.6                 |                            | 0.0                 | 0.0                | 0.1                 |
| G_precuneus               | 0.3                 | 0.0                | 0.2                 |                            | 0.3                 | 0.1                | 0.1                 |
| G_rectus                  | 0.5                 | 0.5                | 0.1                 |                            | 1.6                 | 0.6                | 0.4                 |
| G_subcallosal             | 0.4                 | 0.6                | 0.2                 |                            | 0.2                 | 0.6                | 0.6                 |
| G_temp_sup-G_T_transv     | 0.2                 | 0.3                | 0.1                 |                            | 0.1                 | 0.0                | 0.1                 |
| G_temp_sup-Lateral        | 0.6                 | 0.9                | 0.5                 |                            | 0.1                 | 0.2                | 0.0                 |
| G_temp_sup-Plan_polar     | 0.3                 | 0.4                | 1.0                 |                            | 0.2                 | 0.2                | 0.1                 |
| G_temp_sup-Plan_tempo     | 0.2                 | 0.2                | 0.2                 |                            | 2.5                 | 1.9                | 0.1                 |
| G_temporal_inf            | 0.8                 | 0.2                | 1.2                 |                            | 0.5                 | 0.9                | 0.4                 |
| G_temporal_middle         | 1.1                 | 0.1                | 0.9                 |                            | 0.3                 | 0.4                | 0.3                 |
| Lat_Fis-ant-Horizont      | 0.9                 | 0.7                | 0.3                 |                            | 0.3                 | 0.9                | 0.9                 |
| Lat_Fis-ant-Vertical      | 0.0                 | 0.0                | 0.1                 |                            | 0.0                 | 0.1                | 0.2                 |
| Lat_Fis-post              | 0.2                 | 0.1                | 0.4                 |                            | 0.4                 | 0.1                | 0.2                 |
| Pole_occipital            | 0.1                 | 0.0                | 0.1                 |                            | 0.6                 | 0.0                | 0.2                 |
| Pole_temporal             | 0.3                 | 0.1                | 0.4                 |                            | 0.4                 | 0.0                | 0.3                 |
| S_calcarine               | 0.2                 | 0.1                | 0.5                 |                            | 0.3                 | 0.5                | 0.3                 |
| S_central                 | 2.8                 | 0.6                | 0.2                 |                            | 0.5                 | 1.0                | 0.5                 |
| S_cingul-Marginalis       | 0.1                 | 0.0                | 0.1                 |                            | 0.1                 | 0.1                | 0.1                 |
| S_circular_insula_ant     | 0.0                 | 0.0                | 0.0                 |                            | 0.4                 | 0.4                | 0.4                 |
| S_circular_insula_inf     | 0.5                 | 0.1                | 0.1                 |                            | 0.4                 | 0.3                | 0.3                 |
| S_circular_insula_sup     | 0.4                 | 0.4                | 0.3                 |                            | 0.7                 | 0.6                | 1.5                 |
| S_collat_transv_ant       | 0.2                 | 0.1                | 0.1                 |                            | 0.7                 | 1.3                | 0.3                 |
| S_collat_transv_post      | 0.0                 | 0.1                | 0.3                 |                            | 0.1                 | 0.8                | 0.6                 |
| S_front_inf               | 0.2                 | 0.1                | 1.5                 |                            | 0.3                 | 0.1                | 0.7                 |
| S_front_middle            | 1.1                 | 1.2                | 0.4                 |                            | 0.1                 | 0.4                | 0.4                 |
| S_front_sup               | 0.0                 | 0.2                | 0.0                 |                            | 0.0                 | 0.1                | 0.4                 |
| S_interm_prim-Jensen      | 1.0                 | 0.7                | 0.2                 |                            | 0.6                 | 0.4                | 0.1                 |
| S_intrapariet_and_P_trans | 0.5                 | 0.4                | 0.1                 |                            | 0.5                 | 0.5                | 0.4                 |
| S_oc_middle_and_Lunatus   | 0.1                 | 0.1                | 0.3                 |                            | 1.0                 | 0.8                | 0.3                 |
| S_oc_sup_and_transvers    | 0.5                 | 0.5                | 0.3                 |                            | 0.0                 | 0.2                | 0.5                 |
| S_occipital_ant           | 0.2                 | 0.4                | 0.8                 |                            | 0.0                 | 0.0                | 0.1                 |
| S_oc-temp_lat             | 0.1                 | 0.1                | 1.1                 |                            | 1.1                 | 1.6                | 0.8                 |
| S_oc-temp_med_and_Lingual | 0.5                 | 0.0                | 0.4                 |                            | 0.5                 | 0.4                | 0.1                 |
| S_orbital_lateral         | 0.7                 | 0.2                | 0.4                 |                            | 0.2                 | 0.1                | 0.8                 |
| S_orbital_med-olfact      | 0.7                 | 0.0                | 0.2                 |                            | 0.3                 | 0.2                | 0.4                 |
| S_orbital-H_Shaped        | 0.5                 | 0.6                | 0.6                 |                            | 0.6                 | 0.9                | 0.2                 |
| S_parieto_occipital       | 0.0                 | 0.2                | 0.1                 |                            | 0.5                 | 0.1                | 0.4                 |
| S_pericallosal            | 0.4                 | 0.3                | 0.2                 |                            | 0.5                 | 0.1                | 0.6                 |
| S_postcentral             | 0.9                 | 0.1                | 0.7                 |                            | 1.0                 | 1.0                | 0.8                 |
| S_precentral-inf-part     | 1.0                 | 0.4                | 1.0                 |                            | 0.4                 | 0.4                | 0.2                 |
| S_precentral-sup-part     | 0.6                 | 0.6                | 0.2                 |                            | 0.1                 | 0.3                | 0.4                 |
| S_suborbital              | 0.0                 | 0.1                | 0.4                 |                            | 0.4                 | 0.6                | 0.4                 |
| S_subparietal             | 0.8                 | 0.9                | 0.1                 |                            | 0.1                 | 0.2                | 0.0                 |
| S_temporal_inf            | 0.2                 | 0.0                | 0.5                 |                            | 0.4                 | 0.2                | 0.1                 |
| S_temporal_sup            | 0.0                 | 0.3                | 0.6                 |                            | 0.2                 | 0.2                | 0.0                 |
| S_temporal_transverse     | 0.9                 | 1.2                | 1.0                 |                            | 0.8                 | 0.5                | 1.1                 |

**Note.** SurfArea = surface area; GrayVol = gray matter volume; ThickAvg = average cortical thickness; lh = left hemisphere; rh = right hemisphere. *p*-values are expressed as the negative exponents of ten.

## MR spectroscopy

The means for Glx and GABA across all time points for both real and sham tDCS groups are presented in Table S2. Figure S2 depicts the voxel placement (panel A), a typical MR spectroscopy spectrum as provided by LCModel (panel B), and mean Glx and GABA levels for the DLPFC and TPC in real and sham participants across baseline, post-treatment, and follow-up (panels C to F).

None of the other metabolites or parameters (choline, creatine, myo-inositol and NAA) showed a significant main effect or interaction involving the factor Stimulation. The SNR did not differ between groups (all  $F_{(1,18)} \leq 2.00$ ,  $p \geq .182$ ,  $\eta_p^2 \leq .143$ ).

Table S2

*Descriptive means for Glx and GABA by real and sham group (values in institutional units).*

| Test       | Baseline |      | Post-treatment |      | Follow-up |      |
|------------|----------|------|----------------|------|-----------|------|
|            | Real     | Sham | Real           | Sham | Real      | Sham |
| Glx DLPFC  | 13.0     | 13.6 | 12.4           | 14.1 | 12.2      | 13.6 |
| Glx TPC    | 12.6     | 12.4 | 12.6           | 12.7 | 12.7      | 14.0 |
| GABA DLPFC | 2.5      | 2.3  | 2.5            | 2.6  | 2.4       | 2.2  |
| GABA TPC   | 2.3      | 2.5  | 2.4            | 2.3  | 2.4       | 2.5  |

*Glx – glutamine + glutamate, GABA –  $\gamma$ -aminobutyric acid.*

**A**

**B**

**C**

**DLPFC GLX**

| Group     | Baseline | Post-treatment | Follow-up |
|-----------|----------|----------------|-----------|
| Real tDCS | ~13.2    | ~12.2          | ~12.3     |
| Sham tDCS | ~13.5    | ~14.5          | ~13.5     |

**D**

**TPC GLX**

| Group     | Baseline | Post-treatment | Follow-up |
|-----------|----------|----------------|-----------|
| Real tDCS | ~12.0    | ~12.5          | ~12.3     |
| Sham tDCS | ~13.5    | ~12.8          | ~14.5     |

**E**

**DLPFC GABA**

| Group     | Baseline | Post-treatment | Follow-up |
|-----------|----------|----------------|-----------|
| Real tDCS | ~2.5     | ~2.55          | ~2.35     |
| Sham tDCS | ~2.3     | ~2.6           | ~2.3      |

**F**

**TPC GABA**

| Group     | Baseline | Post-treatment | Follow-up |
|-----------|----------|----------------|-----------|
| Real tDCS | ~2.25    | ~2.3           | ~2.35     |
| Sham tDCS | ~2.6     | ~2.5           | ~2.65     |

6

## Simultaneous Dichotic listening and fMRI paradigm

In the dichotic listening task, we found a significant main effect *Attentional focus* ( $F_{(2,16)}=5.38$ ,  $p=.016$ ,  $\eta_p^2=.402$ ), with the highest accuracy rate in the no attentional focus condition ( $M=35.0\%$ ,  $SD=1.1\%$ ), compared to attentional focus left ( $M=33.7\%$ ,  $SD=1.5\%$ ) and right ( $M=34.6\%$ ,  $SD=1.3\%$ ), and a significant interaction between *Attentional focus* and baseline AHRS scores ( $F_{(2,16)}=4.70$ ,  $p=.025$ ,  $\eta_p^2=.370$ ).

Figure S5 below depicts a T-contrast across all three attentional focus conditions showing typical auditory cortex and temporo-parietal cortex activations during dichotic listening ( $p<.05$  (FWE)).

Figure S5

*T-contrasts for dichotic listening paradigm.*

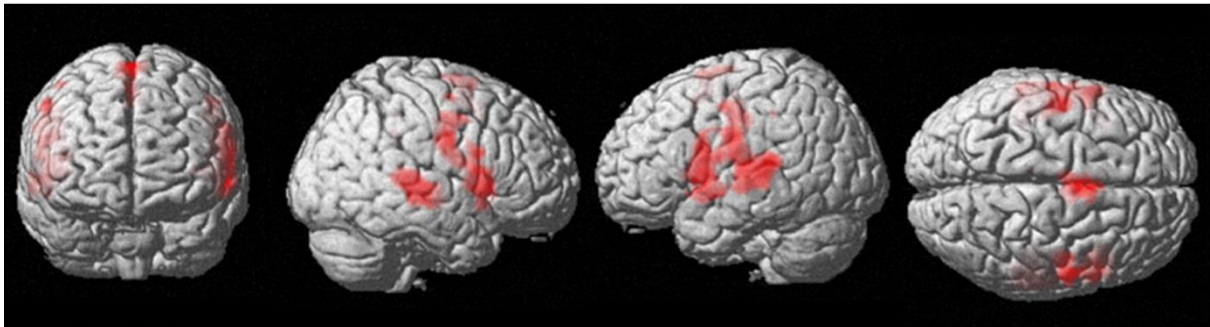

## Simulation of electrical field

Figure S6

*Electrical field simulation of tDCS for all participants in the real tDCS and sham tDCS groups.*

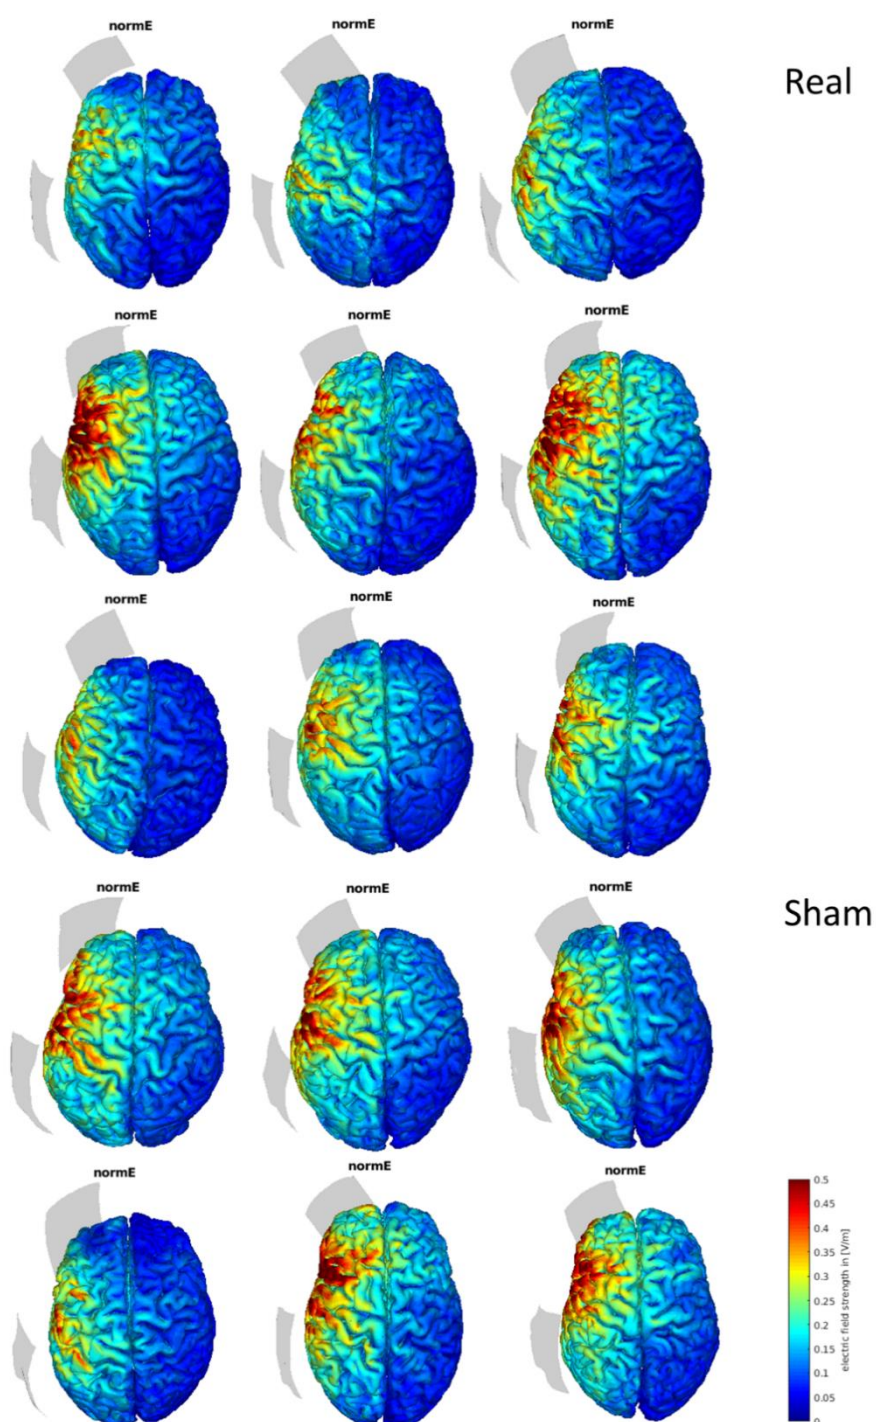

Notes. Electric fields (EF) (in V/m, maximum set on 0.5) for all participants receiving real and sham tDCS. Despite considerable inter-individual differences, no systematic differences between the two groups are observed (see main manuscript, section 4.6).

## Correlations

In addition to the correlations provided in the main text, we explored whether changes in structural data were correlated with changes neurotransmitters. To this end, we computed correlations between structural changes at post-treatment and follow-up for all 12 chosen brain areas and changes in Glx and GABA at post-treatment and follow-up across all participants. None of these correlations were significant when corrected for multiple testing (all  $rs \leq -.74$ ,  $ps = .002$ ,  $ps_{corr} = 1.0$ ).

To see if changes in structural data are associated with the simulated electric field, post-treatment and follow-up change in structural data for all 12 chosen brain areas were correlated with electric field and focality measures for those participants only who received real tDCS. None of these correlations were significant (all  $rs \leq -.79$ ,  $ps = .011$ ,  $ps_{corr} = 1.0$ ) when corrected for multiple testing. Similarly, electric field and focality measures were correlated with Glx and GABA changes at post-treatment and follow-up in participants who received real tDCS. None were significant when corrected for multiple testing (all  $rs \leq -.63$ ,  $ps = .067$ ,  $ps_{corr} = 1.0$ ). All corrections are based on the Holm's method [1].

## Blinding, expectations, and side effects

In the real tDCS group, 8/11 participants (73%) and 4/10 participants (40%) in the sham group guessed correctly that they received real or sham tDCS (Fisher's Exact test,  $p = .142$ , one-sided). The number of correct guesses in the real tDCS group ( $p = .227$ ) and sham group ( $p = .754$ ) did not differ significantly from 50% as indicated by a binominal test. The experimenter guessed correctly for 5/11 (46%) of the participants in the real group and for 7/10 (70%) in the sham group (Fisher's Exact test,  $p = .245$ , one-sided). The number of total correct guesses did not differ significantly from 50% ( $p = .664$ ).

Expectations for the treatment were generally high, with only 19% of participants expecting less than 5 on the 0-10 scale. Means in the real tDCS and sham group ( $M=6.8$ ) did not differ significantly (see Table 1).

The number of participants reporting side effects are presented in Table 4 below. Chi-squared tests showed significant difference in neck pain ( $\chi^2=25.37, p<.001$ ), tingling sensation (all  $\chi^2=22.60, p<.001$ ) and red skin (all  $\chi^2=29.10, p<.001$ ) in reports of any of the side effects between real tDCS and sham groups, when mild, moderate, and severe reports were combined into “present” versus “absent”. Note that neck pain was more reported in the sham group.

Participants did not guess significantly above chance level, but there was, descriptively, a tendency towards guessing that participants received real tDCS ( $n=13$ ) versus guessing whether they received sham ( $n=8$ ). This may be due to the tDCS-like sensations that participants experienced at the beginning of sham and, possibly, reflect participants’ hope to receive real treatment. Nevertheless, it seems fair to conclude that the blinding worked reasonably well.

Table S3

*Frequency of adverse events as measured with the tDCS Adverse Effects Questionnaire in number of occurrences in all real and sham tDCS sessions (n=210).*

| Adverse effects   | Real tDCS (110 sessions) |          |        |           | Sham tDCS (100 sessions) |          |        |           | <i>p</i> for Chi <sup>2</sup> |
|-------------------|--------------------------|----------|--------|-----------|--------------------------|----------|--------|-----------|-------------------------------|
|                   | Mild                     | Moderate | Severe | $\Sigma$  | Mild                     | Moderate | Severe | $\Sigma$  |                               |
| Headache          | 6                        | 2        | -      | <b>8</b>  | 14                       | -        | -      | <b>14</b> | .031                          |
| Neckpain          | 1                        | -        | -      | <b>1</b>  | 9                        | 10       | 2      | <b>21</b> | <b>&lt;.001</b>               |
| Pain in Skull     | 9                        | 5        | -      | <b>14</b> | 10                       | -        | -      | <b>10</b> | .102                          |
| Tingling          | 40                       | 22       | -      | <b>62</b> | 21                       | 3        | 1      | <b>25</b> | <b>&lt;.001</b>               |
| Itching           | 31                       | 7        | -      | <b>38</b> | 19                       | 2        | -      | <b>21</b> | .141                          |
| Burning sensation | 35                       | 3        | -      | <b>38</b> | 18                       | 7        | 2      | <b>27</b> | .05                           |
| Red skin          | 34                       | 1        | -      | <b>35</b> | 2                        | -        | -      | <b>2</b>  | <b>&lt;.001</b>               |
| Sleepiness        | 11                       | 9        | 1      | <b>21</b> | 16                       | 7        | 1      | <b>24</b> | .474                          |
| Concentration     | 10                       | 6        | -      | <b>16</b> | 8                        | 1        | -      | <b>9</b>  | .242                          |
| Change in Humor   | 2                        | -        | -      | <b>2</b>  | 7                        | 5        | -      | <b>12</b> | .005                          |

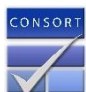

## CONSORT 2010 checklist of information to include when reporting a randomised trial\*

| Section/Topic                                    | Item No | Checklist item                                                                                                                        | Reported on page No |
|--------------------------------------------------|---------|---------------------------------------------------------------------------------------------------------------------------------------|---------------------|
| <b>Title and abstract</b>                        | 1a      | Identification as a randomised trial in the title                                                                                     | 1                   |
|                                                  | 1b      | Structured summary of trial design, methods, results, and conclusions                                                                 | 1                   |
| <b>Introduction</b><br>Background and objectives | 2a      | Scientific background and explanation of rationale                                                                                    | 1-2                 |
|                                                  | 2b      | Specific objectives or hypotheses                                                                                                     | 2                   |
| <b>Methods</b><br>Trial design                   | 3a      | Description of trial design (such as parallel, factorial) including allocation ratio                                                  | 6, table 2          |
|                                                  | 3b      | Important changes to methods after trial commencement (such as eligibility criteria), with reasons                                    | 15                  |
| Participants                                     | 4a      | Eligibility criteria for participants                                                                                                 | 3                   |
|                                                  | 4b      | Settings and locations where the data were collected                                                                                  | 3                   |
| Interventions                                    | 5       | The interventions for each group with sufficient details to allow replication, including how and when they were actually administered | 3 and 5             |
| Outcomes                                         | 6a      | Completely defined pre-specified primary and secondary outcome measures, including how and when they were assessed                    | 3                   |
|                                                  | 6b      | Any changes to trial outcomes after the trial commenced, with reasons                                                                 | 3                   |
| Sample size                                      | 7a      | How sample size was determined                                                                                                        | 15                  |
|                                                  | 7b      | When applicable, explanation of any interim analyses and stopping guidelines                                                          | NA                  |
| Randomisation:                                   | 8a      | Method used to generate the random allocation sequence                                                                                | 3-4                 |

|                                                      |     |                                                                                                                                                                                             |                             |
|------------------------------------------------------|-----|---------------------------------------------------------------------------------------------------------------------------------------------------------------------------------------------|-----------------------------|
| Sequence generation                                  | 8b  | Type of randomisation; details of any restriction (such as blocking and block size)                                                                                                         | 3-4                         |
| Allocation concealment mechanism                     | 9   | Mechanism used to implement the random allocation sequence (such as sequentially numbered containers), describing any steps taken to conceal the sequence until interventions were assigned | 3-4                         |
| Implementation                                       | 10  | Who generated the random allocation sequence, who enrolled participants, and who assigned participants to interventions                                                                     | 3-4                         |
| Blinding                                             | 11a | If done, who was blinded after assignment to interventions (for example, participants, care providers, those assessing outcomes) and how                                                    | 3-4                         |
|                                                      | 11b | If relevant, description of the similarity of interventions                                                                                                                                 | 5                           |
| Statistical methods                                  | 12a | Statistical methods used to compare groups for primary and secondary outcomes                                                                                                               | 6-10                        |
|                                                      | 12b | Methods for additional analyses, such as subgroup analyses and adjusted analyses                                                                                                            | Supplementary Material (SM) |
| <b>Results</b>                                       |     |                                                                                                                                                                                             |                             |
| Participant flow (a diagram is strongly recommended) | 13a | For each group, the numbers of participants who were randomly assigned, received intended treatment, and were analysed for the primary outcome                                              | 4, table 1                  |
|                                                      | 13b | For each group, losses and exclusions after randomisation, together with reasons                                                                                                            | 4, table 1                  |
| Recruitment                                          | 14a | Dates defining the periods of recruitment and follow-up                                                                                                                                     | 6                           |
|                                                      | 14b | Why the trial ended or was stopped                                                                                                                                                          | 6                           |
| Baseline data                                        | 15  | A table showing baseline demographic and clinical characteristics for each group                                                                                                            | 4, table 1                  |
| Numbers analysed                                     | 16  | For each group, number of participants (denominator) included in each analysis and whether the analysis was by original assigned groups                                                     | 5, figure 1                 |
| Outcomes and estimation                              | 17a | For each primary and secondary outcome, results for each group, and the estimated effect size and its precision (such as 95% confidence interval)                                           | 10-14                       |
|                                                      | 17b | For binary outcomes, presentation of both absolute and relative effect sizes is recommended                                                                                                 | NA                          |

|                          |    |                                                                                                                                           |               |
|--------------------------|----|-------------------------------------------------------------------------------------------------------------------------------------------|---------------|
| Ancillary analyses       | 18 | Results of any other analyses performed, including subgroup analyses and adjusted analyses, distinguishing pre-specified from exploratory | SM            |
| Harms                    | 19 | All important harms or unintended effects in each group (for specific guidance see CONSORT for harms)                                     | SM page 15-16 |
| <b>Discussion</b>        |    |                                                                                                                                           |               |
| Limitations              | 20 | Trial limitations, addressing sources of potential bias, imprecision, and, if relevant, multiplicity of analyses                          | 15            |
| Generalisability         | 21 | Generalisability (external validity, applicability) of the trial findings                                                                 | 15            |
| Interpretation           | 22 | Interpretation consistent with results, balancing benefits and harms, and considering other relevant evidence                             | 14-16         |
| <b>Other information</b> |    |                                                                                                                                           |               |
| Registration             | 23 | Registration number and name of trial registry                                                                                            | 3             |
| Protocol                 | 24 | Where the full trial protocol can be accessed, if available                                                                               | NA            |
| Funding                  | 25 | Sources of funding and other support (such as supply of drugs), role of funders                                                           | 16            |

\* We strongly recommend reading this statement in conjunction with the CONSORT 2010 Explanation and Elaboration for important clarifications on all the items. If relevant, we also recommend reading CONSORT extensions for cluster randomised trials, non-inferiority and equivalence trials, non-pharmacological treatments, herbal interventions, and pragmatic trials. References to this checklist, see [www.consort-statement.org](http://www.consort-statement.org).

## References

1. Aickin, M. and H. Gensler, *Adjusting for multiple testing when reporting research results: the Bonferroni vs Holm methods*. American journal of public health, 1996. **86**(5): p. 726-728.
